# Supplementary material for: Dietary curcumin restores insulin homeostasis in diet-induced obese aged mice
Source: publisher site journal article supplement (doi:10.18632/aging.203821), 2022-01-11
Supplement: Supplementary file [file aging-v14i1-203821-supplementary-material-SD1.pdf]

SUPPLEMENTARY FIGURE

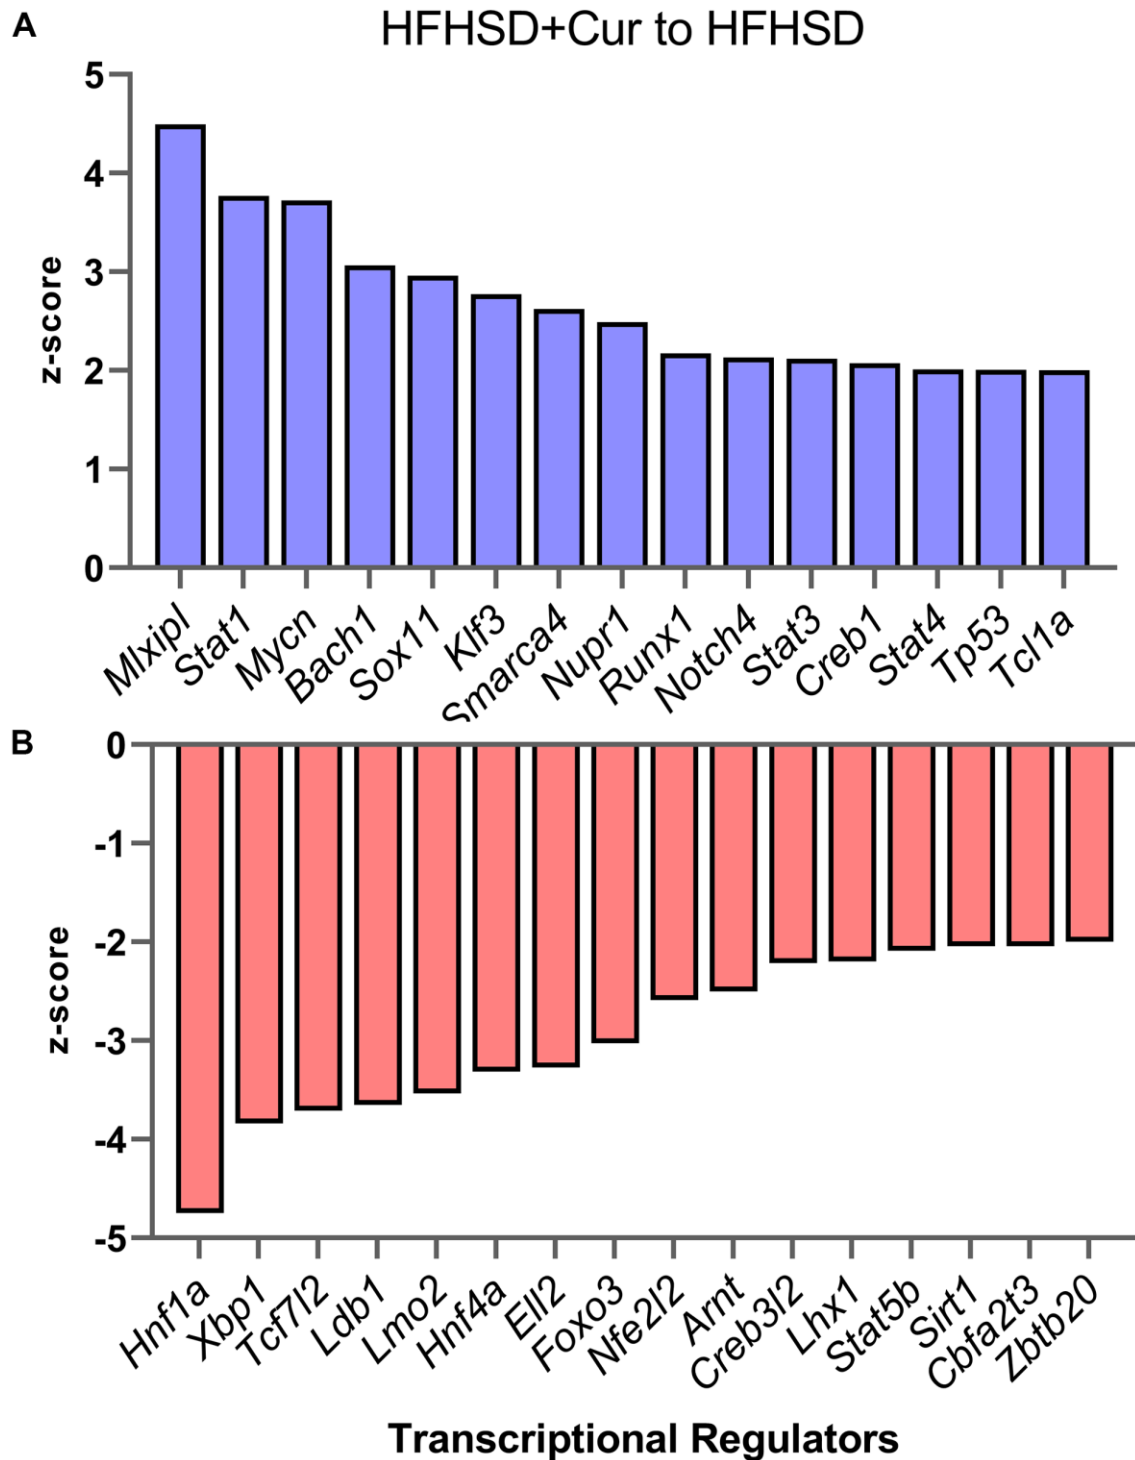

**Supplementary Figure 1. Transcriptional regulators associated with differentially expressed genes.** The z-scores as predicted by Ingenuity Pathway Analysis for upstream transcriptional regulators (TRs) associated with differentially expressed genes are shown for those predicted to be associated with activation (A) or inhibition (B) of downstream genes. The comparison is provided for aging mice fed with HFHSD+CUR and non-supplemented HFHSD control group.
